# Supplementary material for: Racial Disparities in Post-Acute Home Health Care Referral and Utilization among Older Adults with Diabetes
Source: MDPI journal article supplement (doi:10.3390/ijerph18063196), 2021-03-19
Supplement: s1 [file s1]

Table S1. Sample Characteristics Overall, by Discharge Destination, and Use of Home Health Care (HHC) within 14 Days of Index Hospitalization, column percent unless otherwise noted.

| Characteristics                                | Total<br><i>N</i> = 786,758 | Discharged<br>to HHC<br><i>n</i> = 209,152 | Received<br>HHC<br><i>n</i> = 213,766 |
|------------------------------------------------|-----------------------------|--------------------------------------------|---------------------------------------|
| Race/Ethnicity, %                              |                             |                                            |                                       |
| White, non-Hispanic                            | 68.0                        | 69.0                                       | 68.7                                  |
| Black                                          | 17.1                        | 18.2                                       | 18.6                                  |
| Hispanic                                       | 11.0                        | 9.5                                        | 9.7                                   |
| Asian/Pacific Islander                         | 2.5                         | 2.5                                        | 2.3                                   |
| American Indian/Alaska Native                  | 0.7                         | 0.6                                        | 0.6                                   |
| Unknown/Other                                  | 0.7                         | 0.2                                        | ---                                   |
| Sex, %                                         |                             |                                            |                                       |
| Male                                           | 51.2                        | 46.3                                       | 45.3                                  |
| Age, %                                         |                             |                                            |                                       |
| 50-65                                          | 21.7                        | 18.2                                       | 18.5                                  |
| 66-75                                          | 38.0                        | 32.1                                       | 31.0                                  |
| 76-85                                          | 29.1                        | 32.6                                       | 33.0                                  |
| 86+                                            | 11.1                        | 17.2                                       | 17.5                                  |
| Insurance, %                                   |                             |                                            |                                       |
| Fee-for-Service (FFS)                          | 46.2                        | 43.1                                       | 45.0                                  |
| FFS and Medicaid                               | 18.2                        | 20.9                                       | 23.4                                  |
| Medicare Advantage (MA)                        | 24.1                        | 23.0                                       | 20.1                                  |
| MA and Medicaid                                | 11.5                        | 13.0                                       | 11.5                                  |
| RUCC-ADI 2.0 (zip code level), %               |                             |                                            |                                       |
| Rural-Advantaged (ADI 2.0 <85)                 | 13.6                        | 12.0                                       | 12.6                                  |
| Rural-Disadvantaged (ADI 2.0 ≥85)              | 4.1                         | 3.8                                        | 4.3                                   |
| Urban-Advantaged (ADI 2.0 <85)                 | 69.8                        | 71.6                                       | 70.0                                  |
| Urban-Disadvantaged (ADI 2.0 ≥85)              | 12.5                        | 12.7                                       | 13.1                                  |
| Elixhauser score ( $\bar{x}$ )                 | 16.5                        | 16.6                                       | 16.5                                  |
| Comorbidities, %                               |                             |                                            |                                       |
| Chronic pulmonary disease                      | 26.2                        | 29.3                                       | 29.7                                  |
| Congestive heart failure                       | 37.4                        | 44.3                                       | 44.6                                  |
| Dementia                                       | 16.4                        | 23.6                                       | 25.6                                  |
| Depression                                     | 11.4                        | 12.9                                       | 12.9                                  |
| Diabetes with complications                    | 29.4                        | 34.9                                       | 33.9                                  |
| Fluid and electrolyte disorders                | 34.8                        | 40.5                                       | 39.7                                  |
| Hypertension                                   | 89.8                        | 89.4                                       | 89.3                                  |
| Hypothyroidism                                 | 17.9                        | 19.6                                       | 20.0                                  |
| Peripheral vascular disease                    | 17.2                        | 19.4                                       | 19.2                                  |
| Renal failure                                  | 37.2                        | 41.7                                       | 42.0                                  |
| Prior HHC use % (120-day look back)            | 15.4                        | 29.6                                       | 36.9                                  |
| Length of stay, days ( $\bar{x}$ , <i>SD</i> ) | 3.9 (4.2)                   | 5.2 (4.2)                                  | 5.0 (4.1)                             |

Note: Elixhauser score (median, IQR) 26, 14–40; 31, 19–44; 31, 19–43; Length of stay, days (median, IQR) 3, 2–5; 4, 3–6; 4, 3–6; Age (median, IQR) 73, 67–80; 75, 68–83; 76, 68–83.

Table S2. Sample Characteristics Stratified by Neighborhood Profile based on Rural-Urban Designation and the Area Deprivation Index 2.0, row percentage unless otherwise noted

|                                       | Rural-Advantaged |        | Rural-Disadvantaged |        | Urban-Advantaged |        | Urban-Disadvantaged |        |
|---------------------------------------|------------------|--------|---------------------|--------|------------------|--------|---------------------|--------|
| Total                                 | 106,828          | 13.6%  | 32,183              | 4.1%   | 549,175          | 69.8%  | 98,572              | 12.5%  |
| Race/Ethnicity                        |                  |        |                     |        |                  |        |                     |        |
| White, non-Hispanic                   | 92,892           | 17.4%  | 21,503              | 4.0%   | 380,151          | 71.1%  | 40,187              | 7.5%   |
| Black                                 | 8,119            | 6.0%   | 7,314               | 5.4%   | 82,955           | 61.8%  | 35,862              | 26.7%  |
| Hispanic                              | 3,122            | 3.6%   | 2,141               | 2.5%   | 61,414           | 70.7%  | 20,157              | 23.2%  |
| Asian/Pacific Islander                | 579              | 2.9%   | 71                  | 0.4%   | 17,886           | 89.9%  | 1,352               | 6.8%   |
| American Indian/Alaska Native         | 1,568            | 26.8%  | 1,039               | 17.7%  | 2,598            | 44.3%  | 654                 | 11.2%  |
| Sex                                   |                  |        |                     |        |                  |        |                     |        |
| Female                                | 49,349           | 12.9%  | 16,575              | 4.3%   | 264,023          | 68.8%  | 54,020              | 14.1%  |
| Male                                  | 57,479           | 14.3%  | 15,608              | 3.9%   | 285,152          | 70.8%  | 44,552              | 11.1%  |
| Age                                   |                  |        |                     |        |                  |        |                     |        |
| 50–65                                 | 22,329           | 13.1%  | 9,346               | 5.5%   | 109,313          | 64.0%  | 29,929              | 17.5%  |
| 66–75                                 | 43,049           | 14.4%  | 12,322              | 4.1%   | 208,527          | 69.7%  | 35,351              | 11.8%  |
| 76–85                                 | 31,492           | 13.8%  | 8,079               | 3.5%   | 164,982          | 72.0%  | 24,526              | 10.7%  |
| 86+                                   | 9,958            | 11.4%  | 2,436               | 2.8%   | 66,353           | 75.8%  | 8,766               | 10.0%  |
| Insurance, Medicare                   |                  |        |                     |        |                  |        |                     |        |
| Fee-For-Service (FFS)                 | 59,396           | 16.3%  | 13,829              | 3.8%   | 261,886          | 72.0%  | 28,570              | 7.9%   |
| FFS and Medicaid (dual)               | 21,239           | 14.8%  | 10,579              | 7.4%   | 86,569           | 60.5%  | 24,793              | 17.3%  |
| Medicare Advantage (MA)               | 20,001           | 10.6%  | 4,836               | 2.6%   | 141,414          | 74.7%  | 23,142              | 12.2%  |
| MA and Medicaid (dual)                | 6,192            | 6.8%   | 2,939               | 3.2%   | 59,306           | 65.5%  | 22,067              | 24.4%  |
| Elixhauser Score ( $\bar{x}$ , $SD$ ) | 27.1             | (16.3) | 27.53               | (16.1) | 27.99            | (16.6) | 28.82               | (16.6) |
| Comorbidities                         |                  |        |                     |        |                  |        |                     |        |
| Chronic pulmonary disease             | 30,142           | 14.6%  | 9,514               | 4.3%   | 138,819          | 70.2%  | 28,011              | 13.6%  |
| Congestive heart failure              | 40,804           | 13.9%  | 12,379              | 4.2%   | 203,896          | 69.3%  | 37,029              | 12.6%  |
| Dementia                              | 16,422           | 12.8%  | 5,538               | 4.3%   | 90,284           | 70.2%  | 16,424              | 12.8%  |
| Depression                            | 13,053           | 14.5%  | 3,542               | 3.9%   | 62,386           | 69.5%  | 10,849              | 12.1%  |
| Diabetes with complications           | 27,397           | 11.8%  | 8,568               | 3.7%   | 164,250          | 71.0%  | 31,095              | 13.4%  |
| Hypertension                          | 94,434           | 13.4%  | 28,649              | 4.1%   | 493,443          | 69.8%  | 90,053              | 12.7%  |
| Hypothyroidism                        | 19,816           | 14.0%  | 5,404               | 3.8%   | 100,627          | 71.3%  | 15,263              | 10.8%  |

|                                              |        |       |        |       |         |       |        |       |
|----------------------------------------------|--------|-------|--------|-------|---------|-------|--------|-------|
| Fluid and electrolyte disorders              | 35,613 | 13.0% | 11,252 | 4.1%  | 191,504 | 70.0% | 35,261 | 12.9% |
| Peripheral vascular disease                  | 17,888 | 13.2% | 5,262  | 3.9%  | 95,690  | 70.6% | 16,739 | 12.3% |
| Renal failure                                | 37,543 | 12.8% | 11,564 | 3.9%  | 205,360 | 70.1% | 38,525 | 13.1% |
| Discharged to home health care               | 25,044 | 12.0% | 7,851  | 3.8%  | 149,655 | 71.6% | 26,602 | 12.7% |
| Prior HHC (120-day look back)                | 14,787 | 12.2% | 6,054  | 5.0%  | 81,949  | 67.8% | 18,034 | 14.9% |
| Post-Acute HHC, first 14 days                | 27,017 | 12.6% | 9,264  | 4.3%  | 149,489 | 69.9% | 27,996 | 13.1% |
| Hospital Length of Stay ( $\bar{x}$ , $SD$ ) | 3.7    | (3.1) | 3.9    | (3.3) | 3.8     | (3.4) | 4.1    | (3.6) |
| Region                                       |        |       |        |       |         |       |        |       |
| Pacific                                      | 5,060  | 5.8%  | 372    | 0.4%  | 76,193  | 87.8% | 5,123  | 5.9%  |
| East North Central                           | 21,744 | 16.9% | 3,548  | 11.0% | 83,975  | 65.3% | 19,388 | 15.1% |
| East South Central                           | 15,417 | 24.5% | 7,998  | 12.7% | 21,775  | 50.5% | 7,728  | 12.3% |
| Middle Atlantic                              | 7,900  | 7.2%  | 1,121  | 1.0%  | 86,293  | 79.1% | 13,753 | 12.6% |
| Mountain                                     | 4,797  | 13.2% | 1,114  | 3.1%  | 26,484  | 72.9% | 3,942  | 10.9% |
| New England                                  | 3,515  | 10.9% | 193    | 0.6%  | 27,299  | 84.9% | 1,142  | 3.6%  |
| South Atlantic                               | 21,935 | 12.0% | 8,426  | 4.6%  | 129,726 | 70.9% | 22,998 | 23.3% |
| West North Central                           | 12,523 | 1.6%  | 2,435  | 5.4%  | 26,509  | 58.3% | 3,988  | 4.1%  |
| West South Central                           | 13,876 | 14.8% | 6,547  | 7.0%  | 57,139  | 60.8% | 16,425 | 17.5% |
| Puerto Rico                                  | 59     | 0.7%  | 429    | 5.2%  | 3,740   | 45.0% | 4,075  | 49.1% |

Note: HHC: home health care; AIAN: American Indian/ Alaska Native; Hospital Length of stay (median, IQR) 3, 2–5; 3, 2–5; 3, 2–5; 3, 2–5; Age (median, IQR) 73, 67–79; 71, 65–78; 73, 67–81; 71, 65–78; Elixhauser score (median, IQR) 26, 14–38; 26, 14–39; 26, 14–40; 27, 15–41; Disadvantaged: ADI 2.0  $\geq$  85<sup>th</sup> percentile; Advantaged: ADI 2.0 < 85<sup>th</sup> percentile

Table S3. Sample Characteristics Stratified by Insurance Type, row percentage unless otherwise noted

|                                            | Medicare fee-<br>for-service only | Dual Medicare fee-<br>for-service/Medicaid | Medicare<br>Advantage only | Dual Medicare Ad-<br>vantage/Medicaid |
|--------------------------------------------|-----------------------------------|--------------------------------------------|----------------------------|---------------------------------------|
| Total                                      | 363,681 46.2%                     | 143,180 18.2%                              | 189,393 24.1%              | 90,504 11.5%                          |
| Race/Ethnicity                             |                                   |                                            |                            |                                       |
| White, non-Hispanic                        | 292,162 54.6%                     | 73,241 13.7%                               | 133,477 25.0%              | 35,853 6.7%                           |
| Black                                      | 43,151 32.1%                      | 36,592 27.3%                               | 27,862 20.8%               | 26,645 19.9%                          |
| Hispanic                                   | 17,581 20.3%                      | 23,948 27.6%                               | 22,138 25.5%               | 23,167 26.7%                          |
| Asian/Pacific Islander                     | 5,392 27.1%                       | 6,763 34.0%                                | 3,817 19.2%                | 3,916 19.7%                           |
| American Indian/Alaska Native              | 2,754 47.0%                       | 2,098 35.8%                                | 591 10.1%                  | 416 7.1%                              |
| Sex                                        |                                   |                                            |                            |                                       |
| Female                                     | 157,751 41.1%                     | 87,250 22.7%                               | 83,309 21.7%               | 55,657 14.5%                          |
| Male                                       | 205,930 26.2%                     | 55,930 7.1%                                | 106,084 13.5%              | 34,847 4.4%                           |
| Age ( $\bar{x}$ , <i>SD</i> )              | 74.6 (9.1)                        | 69.5 (10.9)                                | 74.2 (8.7)                 | 70.9 10.2%                            |
| 50–65                                      | 54,820 32.1%                      | 59,089 34.6%                               | 28,892 16.9%               | 28,116 16.5%                          |
| 66–75                                      | 146,173 48.9%                     | 41,168 13.8%                               | 79,620 26.6%               | 32,288 10.8%                          |
| 76–85                                      | 115,847 50.6%                     | 30,160 13.2%                               | 60,626 26.5%               | 22,446 9.8%                           |
| 86+                                        | 46,841 53.5%                      | 12,763 14.6%                               | 20,255 23.2%               | 7,654 8.8%                            |
| RUCC-ADI 2.0                               |                                   |                                            |                            |                                       |
| Rural-Advantaged (ADI 2.0 <85)             | 59,396 55.6%                      | 21,239 19.9%                               | 20,001 18.7%               | 6,192 5.8%                            |
| Rural-Disadvantaged (ADI 2.0 ≥ 85)         | 13,829 43.0%                      | 10,579 32.9%                               | 4,836 15.0%                | 2,939 9.1%                            |
| Urban-Advantaged (ADI 2.0 <85)             | 261,886 47.7%                     | 86,569 15.8%                               | 141,414 25.8%              | 59,306 10.8%                          |
| Urban-Disadvantaged (ADI 2.0 ≥ 85)         | 28,570 29.0%                      | 24,793 25.2%                               | 23,142 23.5%               | 22,067 22.4%                          |
| Elixhauser score ( $\bar{x}$ , <i>SD</i> ) | 27.1 (16.4)                       | 30.7 (16.5)                                | 27.1 (16.5)                | 28.8 (16.5)                           |
| Comorbidities                              |                                   |                                            |                            |                                       |
| Chronic pulmonary disease                  | 88,115 42.7%                      | 45,530 22.1%                               | 45,495 22.0%               | 27,346 13.2%                          |
| Congestive heart failure                   | 134,953 45.9%                     | 55,680 18.9%                               | 70,087 23.8%               | 33,388 11.4%                          |
| Dementia                                   | 69,500 54.0%                      | 39,160 30.4%                               | 8,642 6.7%                 | 11,366 8.8%                           |
| Depression                                 | 38,550 42.9%                      | 20,466 22.8%                               | 19,125 21.3%               | 11,689 13.0%                          |
| Diabetes with complications                | 95,957 41.5%                      | 47,061 20.4%                               | 58,485 25.3%               | 29,807 12.9%                          |
| Fluid and electrolyte disorders            | 122,590 44.8%                     | 56,854 20.8%                               | 60,701 22.2%               | 33,485 12.2%                          |
| Hypertension                               | 324,962 46.0%                     | 128,659 18.2%                              | 170,711 24.2%              | 82,247 11.6%                          |
| Hypothyroidism                             | 69,082 49.0%                      | 24,142 17.1%                               | 33,517 23.8%               | 33,517 10.2%                          |

|                                                         |         |       |        |       |        |       |        |       |
|---------------------------------------------------------|---------|-------|--------|-------|--------|-------|--------|-------|
| Peripheral vascular disease                             | 60,787  | 44.8% | 23,318 | 17.2% | 36,665 | 27.0% | 14,809 | 10.9% |
| Renal failure                                           | 132,732 | 45.3% | 58,517 | 20.0% | 68,934 | 23.5% | 32,809 | 11.2% |
| Discharged to Home Health Care                          | 90,146  | 43.1% | 43,732 | 20.9% | 48,140 | 23.0% | 27,134 | 13.0% |
| Prior HHC (120-day look back)                           | 49,067  | 40.6% | 36,574 | 30.3% | 19,086 | 15.8% | 16,097 | 13.3% |
| Post-Acute HHC, first 14 days                           | 96,239  | 45.0% | 50,054 | 23.4% | 42,877 | 20.1% | 24,596 | 11.5% |
| Hospital length of stay, days ( $\bar{x}$ , <i>SD</i> ) | 3.7     | (3.2) | 3.7    | (3.2) | 3.9    | (3.4) | 4.0    | (3.6) |

Notes: FFS = Fee-for-services; HHC = home health care ; Hospital length of stay, days (median, IQR) 3, 2–5; 3, 2–5; 3, 2–5; 3, 2–5; Age (median, IQR) 74, 68–81; 68, 61–78; 74, 68–80; 71, 64–78; Elixhauser score (median, IQR) 26, 13–39; 30, 18–42; 25, 13–38; 27, 16–40
